# Supplementary material
Source: publisher site journal article supplement (https://www.dovepress.com/article/supplementary_file/562346/562346_Supplementary%20material.docx)
Supplement: Supplementary file 1 [file 562346_Supplementary%20material.docx]

| **Table S1.** Detailed characteristics of oligonucleotide primers used for RT-qPCR analysis and information on the RT² Profiler PCR Array assays employed for gene expression profiling | | | | | | |
| --- | --- | --- | --- | --- | --- | --- |
|  |  |  |  |  |  |  |
| **Transcript full name** | **Gene abbreviation** | **Sequence 5’-3’** | **Locus** | **Product length** | **Ann. Temp.** | **Ref. number** |
| Glyceraldehyde 3-phosphate dehydrogenase | GAPDH | F: GTCAGTGGTGGACCTGACCT | 796-815 | 256 | 61 °C | NM_002046.7 |
| R: CACCACCCTGTTGCTGTAGC | 1051-1032 |
| BCL2 associated X | BAX | F:GTCTTTTTCCGAGTGGCAGC | 126-145 | 192 | 61 °C | NM_001291428.2 |
| R:GTCTTGGATCCAGCCCAACA | 317-298 |
| BCL2 apoptosis regulator | BCL2 | F:ATCGCCCTGTGGATGACTGAG | 1399-1419 | 129 | 61 °C | NM_000633.3 |
| R:CAGCCAGGAGAAATCAAACAGAGG | 1527-1504 |
| MCL1 Apoptosis Regulator, BCL2 Family Member | MCL1 | F:TACGGACGGGTCACTACCCT | 545 - 564 | 284 | 64 °C | NM_182763.3 |
| R:CAGCACATTCCTGATGCCAC | 828 - 809 |
| Mechanistic target of rapamycin kinase (MTOR) | mTOR | F:GAACGCTTGGCAGCTTTGAA | 1908-1927 | 153 | 64 °C | NM_001386500.1 |
| R:TGATGAGGTGGATGGAGGGT | 2060-2041 |
| Phosphatidylinositol-4,5-bisphosphate 3-kinase catalytic subunit alpha (PIK3CA) | Pi3K | F:TTGTCGTGCATGTGGGATGT | 2396- 2415 | 156 | 64 °C | NM_006218.4 |
| R:TCTGGTCGCCTCATTTGCTC | 2551-2532 |
| AKT serine/threonine kinase 1 (AKT1) | AKT1 | F:CAGGGCTGCTCAAGAAGGAC | 1696-1715 | 168 | 64 °C | NM_005163.2 |
| R:ACCTGGTGTCAGTCTCCGAC | 1863-1844 |
| AKT serine/threonine kinase 2 (AKT2) | AKT2 | F:TTTACCGCCCAGTCCATCAC | 1576-1595 | 107 | 64 °C | NM_001626.6 |
| R:CTGGCCGAGTAGGAGAACTG | 1682-1663 |
| Metastasis associated lung adenocarcinoma transcript 1 | *lncMALAT* | F:AAAGCAAGGTCTCCCCACAAG | 6479-6499 | 71 | 61 °C | NR_002819.5 |
| R:GGTCTGTGCTAGATCAAAAGGCA | 6499-6527 |
| Taurine up-regulated 1 | *lncTUG* | F: CCCGAAAGAGCTTGTCACGA | 2308-2327 | 122 | 61 °C | NM_001398476.1 |
| R: GGTGGTAGTGCTTGCTCAGT | 2429-2410 |
| RT² Profiler™ PCR Array Human Cancer PathwayFinder™ | GeneGlobe ID: PAHS-033Z, Cat. No.: 330231 | | | | | |
| miR-17-5p | miR-17-5p | CAAAGTGCTTACAGTGCAGGTAG | chr13: 91350605-91350688 [+] | not applicable* | 58,8 °C | MI0000071 |
| miR-21-5p | miR-21-5p | TAGCTTATCAGACTGATGTTGA | chr13: 91350891-91350972 [+] | 58,8 °C | MIMAT0000073 |
| miR-140-5p | miR-140-5p | CAGTGGTTTTACCCTATGGTAG | chr16: 69933081-69933180 [+] | 58,8 °C | MIMAT0000431 |
| miR-155-5p | miR-155-5p | TTAATGCTAATCGTGATAGGGGTT | chr21: 25573980-25574044 [+] | 58,8 °C | MIMAT0000646 |
| Legend: | * fixed amplicon size is not applicable because the PCR product includes the miRNA sequence plus a variable-length poly(A) tail and universal adapter sequence. | | | | | |
|  |

| **Table S2.** List of antibodies used for Western blot analysis, including the applied working dilutions | | | | |
| --- | --- | --- | --- | --- |
|  |
| **Protein name** | **Abbreviation** | **Working dilution** | **Product number** | **Company** |  |
| Beta Actin | ACTB | 1:5000 | AF7018 | Affinity Biosciences |  |
|  |
| Apoptosis regulator BAX | BAX | 1:500 | AF0120 | Affinity Biosciences |  |
|  |
| Apoptosis regulator Bcl 2; | BCL2 | 1:500 | AF6139 | Affinity Biosciences |  |
|  |
| Bcl 2 related protein EAT | MCL1 | 1:500 | AF5311 | Affinity Biosciences |  |
|  |
| FK506 binding protein 12 rapamycin associated protein 1 | mTOR | 1:250 | AF6308 | Affinity Biosciences |  |
|  |
| FK506 binding protein 12 rapamycin associated protein 1 | P-mTOR (Ser2448) | 1:250 | AF3308 | Affinity Biosciences |  |
|  |
| Phosphatidylinositol 3 kinase associated p 85 alpha | PI3K p85 alpha | 1:250 | AF6241 | Affinity Biosciences |  |
|  |
| Phosphatidylinositol 3 kinase associated p 85 alpha | P-PI3K p85 alpha (Tyr 607) | 1:250 | AF3241 | Affinity Biosciences |  |
|  |
| Protein kinase B | pan-AKT1/2/3 | 1:500 | AF6241 | Affinity Biosciences |  |
|  |
| Protein kinase B | P-AKT1/2/3 (Ser473) | 1:500 | AF6261 | Affinity Biosciences |  |
|  |
